# Supplementary material for: Adjuvant Immunotherapy to Improve Outcome in High-Risk Pediatric Sarcomas
Source: Oxford University Press journal article supplement (doi:10.1158/1078-0432.ccr-15-2550), 2016-01-28
Supplement: 10780432ccr152550-sup-157139_2_supp_3289710_z06zbs.docx [file 10780432ccr152550-sup-157139_2_supp_3289710_z06zbs.docx]

**Supplemental Table 1. Grade 3, 4 Toxicities Possibly Related and Grade 2 Toxicities Likely Related to Regimen**

| **Toxicity** | **Grade 2** | **Grade 3** | **Grade 4** |
| --- | --- | --- | --- |
| ALT increased# | 7 (24%) | 2 (7%) | 0 (0%) |
| AST increased# | 1 (3%) | 1 (3%) | 0 (0%) |
| WBC decreased | 0 (0%) | 1 (3%) | 0 (0%) |
| Anaphylaxis# | 0 (0%) | 4 (14%) | 0 (0%) |
| Injection site reaction∞ | 5 (17%) | 0 (0%) | 0 (0%) |
| Pruritis | 1 (3%) | 0 (0%) | 0 (0%) |

#temporally related to CYT107 administration

∞occurred at site of dendritic cell vaccination
